# Supplementary material for: Kinetics and thermodynamics of the decarboxylation of 1,2-glycerol carbonate to produce glycidol: computational insights
Source: Royal Society of Chemistry journal article supplement (doi:10.1039/c3gc41643g), 2013-11-05
Supplement: c3gc41643g.pdf [file c3gc41643g.pdf]

**Supporting information**

**Kinetics and thermodynamics of the  
decarboxylation of 1,2-glycerol carbonate to  
produce glycidol: computational insights**

*Donald. J. Darensbourg,\* Andrew. D. Yeung*

Department of Chemistry, Texas A&M University, 3255 TAMU, College Station, TX 77843.

|                                                                                                                                       | Page |
|---------------------------------------------------------------------------------------------------------------------------------------|------|
| Table S1. Thermodynamics of polymer vs. cyclic carbonate formation. ....                                                              | S2   |
| Table S2. Metric parameters for dimethyl carbonate, 1,2- and 1,3-glycerol carbonates, and propylene and trimethylene carbonates. .... | S2   |

**Table S1.** Thermodynamics of polymer vs. cyclic carbonate formation.

|                                      | Enthalpy (kcal/mol) |                  | Free Energy (kcal/mol) |                  |
|--------------------------------------|---------------------|------------------|------------------------|------------------|
|                                      | Polymer             | Cyclic Carbonate | Polymer                | Cyclic Carbonate |
| Ethylene carbonate                   | -21.2               | -15.1            | -0.4                   | -3.8             |
| Propylene carbonate                  | -21.2               | -15.7            | 0.5                    | -4.2             |
| Chloropropylene carbonate            | -22.1               | -13.8            | 0.1                    | -2.5             |
| Styrene carbonate <sup>†</sup>       | -22.8               | -14.8            | -0.8                   | -3.4             |
| Cyclopentene carbonate*              | -15.8               | -14.5            | 7.1                    | -5.8             |
| Indene carbonate*                    | -21.1               | -18.2            | 1.5                    | -6.6             |
| Cyclohexene carbonate*               | -22.6               | -16.7            | 3.4                    | -4.6             |
| Trimethylene carbonate               | -23.1               | -11.7            | -2.6                   | -0.8             |
| 1,2-Glycerol carbonate               | -21.3               | -16.2            | 0.6                    | -4.3             |
| 1,2-Glycerol carbonate, methyl ether | -22.1               | -15.3            | 0.0                    | -3.9             |
| 1,3-Glycerol carbonate               | -22.3               | -9.0             | -0.5                   | 1.7              |
| 1,3-Glycerol carbonate, methyl ether | -20.9               | -8.2             | 0.7                    | 2.8              |

Average of 4 iterations unless noted. \* Calculated from 1-mer + CO<sub>2</sub> + epoxide → 2-mer. † Average of 3 iterations (until 4-mer).

**Table S2.** Metric parameters for dimethyl carbonate, 1,2- and 1,3-glycerol carbonates, and propylene and trimethylene carbonates.

|                                        | DMC          |            |            | Glycerol     |                |            |                |              | PC/TMC         |            |                |
|----------------------------------------|--------------|------------|------------|--------------|----------------|------------|----------------|--------------|----------------|------------|----------------|
|                                        | O-C-O<br>(°) | C=O<br>(Å) | C-O<br>(Å) | O-C-O<br>(°) | O-C-C<br>(°)   | C=O<br>(Å) | C-O<br>(Å)     | O-C-O<br>(°) | O-C-C<br>(°)   | C=O<br>(Å) | C-O<br>(Å)     |
| 1,2-Carbonate                          |              |            |            | 108.8        | 102.3<br>101.6 | 1.183      | 1.370<br>1.362 | 108.8        | 101.4<br>102.6 | 1.183      | 1.364<br>1.366 |
| 1,3-Carbonate                          | 110.0        | 1.206      | 1.332      | 116.0        | 108.5<br>110.9 | 1.187      | 1.352<br>1.357 | 116.6        | 109.9<br>109.9 | 1.189      | 1.353<br>1.353 |
| Enthalpy difference, 1,2-1,3, kcal/mol |              | N.A.       |            |              | -7.3           |            |                |              | -9.0           |            |                |
